# Supplementary material for: Genetic screens reveal novel major and minor players in magnesium homeostasis of Staphylococcus aureus
Source: PLoS Genet. 2019 Aug 15;15(8):e1008336. doi: 10.1371/journal.pgen.1008336 (PMC6711546; doi:10.1371/journal.pgen.1008336)
Supplement: S2 Table — (XLSX) [file pgen.1008336.s002.xlsx]

## Sheet: Sheet1
Plasmids	Description	Reference
pCN47	High copy vector with an erythromycin cassette	(Charpentier et al. 2004)
pTA	pCN47 with a tetracycline cassette instead of erythromycin	This work
pmpfA	pCN47 carrying SA0657	This work
pmpfB	pCN47 carrying SA0780	This work
pCorA	pCN47 carrying SA2137	This work
pCorA2	pCN47 carrying SA2166	This work
pmgtE	pTA02 carrying SA0867 under the control of pHU promoter	This work
pRLYT8	Low copy shuttle vector with a ColE1 origin and a ampiciline cassette for replication in E. coli, and a tetracycline cassette, a thermosensitive ori and pyrEF genes	(Redder and Linder 2012)
pRLYT8-mpfA	pRLYT8 desiged to replace mpfA by a chloramphenicol cassette	(Armitano et al. 2016)
pRLYT8-0780	pRLYT8 designed to delete mpfB	This work
pRLYT8-2137	pRLYT8 designed to delete corA1	This work
pRLYT8-2166ery	pRLYT8 desiged to replace corA2 by an erythromycin cassette	This work
pRLYT8-0867	pRLYT8 designed to delete mgtE	This work
pRLYT8-2166-A186T	pRLYT8 designed to insert CorA2 A186T	This work
pRLYT8-2166-T227I	pRLYT8 designed to insert CorA2 T227I	This work
pRLYT9-216617-2	pRLYT9 designed to insert CorA2 S237R	(Redder and Linder 2012)
pRLYT8-2166RHS03	pRLYT8 designed to insert CorA2 M250I	This work
pRLYT9-2166F2R2	pRLYT9 designed to repair the P32T in SA2166	This work
pRLYT8-0780-AUG	pRLYT8 designed to insert 0780 with an AUG start codon	This work
pMK-pHU-GFP	pMK vector carrying GFPuv under the control of constituve S. aureus promoter pHu	doi: 10.1128/JB.00261-16
pMK-BSmgtE-GFP	pHU promoter from pMK-pHU-GFP was replaced by promoter of B. subtilis mgtE	This work
