# Supplementary material for: Genetic screens reveal novel major and minor players in magnesium homeostasis of Staphylococcus aureus
Source: PLoS Genet. 2019 Aug 15;15(8):e1008336. doi: 10.1371/journal.pgen.1008336 (PMC6711546; doi:10.1371/journal.pgen.1008336)
Supplement: S3 Table — (XLSX) [file pgen.1008336.s003.xlsx]

## Sheet: Sheet1
Primer name	Sequence	Construct
TetK-Bgl-R1	GCGATAGATCTTACGTGTGCTCTGCGAGGCT	pTA
TetK-pT181-Cla-R1	TAATAAATCGATCATACGTGTGCTCTGCGAGG	pTA
SA0657_flag_Bam_R	CGGGATCCTTACTTATCGTCGTCATCCTTGTAATCTTCTGATTTTTCATCTTCATCAGACTG	pmpfA
SA0657-Sal-F1	TAATAAGTCGACAATAAAACAAGGCAAGGTTCAC	pmpfA
SA0780_sal_F1	GAGGTCGACCTGGTTGTTATCATTATAATGG	pmpfB
SA0780_flag_Bam_R	CGGGATCCTTACTTATCGTCGTCATCCTTGTAATCTATAGATACGTTGCGATTTTTCC	pmpfB
SA2137-bam-R1	GGGGGATCCTTAAAACCATTTTTTACGTCTGAAAAAGATG	pCorA
SA2137-nar-F1	GGGGGCGCCGTTTGATAATAACCATCTCCTTAGTG	pCorA
SA2166-Sal-F1	CGATGGGTCGACATACTCGCTTTTCCTAAATCC	pCorA2
SA2166_flag_BamR	GGGGATCCGTTATAACTTATCGTCGTCATCCTTGTAATCTTTCTGTTTACGCCATAAGA	pCorA2
phu_sal_F	GGGTCGACATTATATAGAGTATTATTTGAAAATATCTCAG	pmgtE
SA0867_eco_R	GGGAATTCTTTCTGCAACAACAACTGGC	pmgtE
SA0867_fusphu_DF	GGAGGAACAATCATGTCAATGAACACAGATG	pmgtE
SA0867_eco_R	GGGAATTCTTTCTGCAACAACAACTGGC	pmgtE
SA0657-EXT-F1	CAAAGTTTATACTGAAGATGGC	pRLYT8-mpfA
SA0657-INT-F1	ATGCGTGTTACCCATGAGTG	pRLYT8-mpfA
SA0657-L-Bam-R1	AGGTTGGGATCCAACAAATACAGTGGTTAATGC	pRLYT8-mpfA
SA0657-R-Bam-F1	AGGTTGGGATCCGAGACCTACTATCGGACAGTC	pRLYT8-mpfA
SA0657-INT-R1	TAATGCGAATTATCGCTTTCA	pRLYT8-mpfA
SA0657-R-Xho-R1	CCACGGCTCGAGAAACAAGGAATGACGACTCT	pRLYT8-mpfA
SA0657-EXT-R1	ATAGTGGTATCCGTACTTCC	pRLYT8-mpfA
ProPhi-EXT-F1	CTGAAGAAGAATAGAATGCTG	pRLYT8-0780
ProPhi-Nar-F1	TAATACGGCGCCTCCACGACGATGATGTATCC	pRLYT8-0780
ProPhi-INT-F1	TTAGAACATGAAGCCAAGGT	pRLYT8-0780
SA0780-L-Bam-R1	TATTAAGGATCCAATGATCACGCGTGTAGTC	pRLYT8-0780
SA0780-R-Bam-F1	TATTATGGATCCGAAGAATTATTAGGTATGGAAAT	pRLYT8-0780
SA0780-INT-R1	GATATTCAATACTTAACATTTGAG	pRLYT8-0780
SA0780_Xho_R2	GGGCTCGAGTTGGACATGATGGTGTTGGCG	pRLYT8-0780
SA0780_ext_R2	TTATAATCATTTCGGTGACC	pRLYT8-0780
SA2137-ext-F1	CCACCAGTTTATATGTTTGG	pRLYT8-SA2137
SA2137-Nar-F	GGGGGCGCCCCAATAAGTGTATTGATATGTGTG	pRLYT8-SA2137
SA2137-seq-up	GTTTGATAATAACCATCTCCTTAGTG	pRLYT8-SA2137
SA2137_fus_UR	AATGCCGGCATAGATATCATCAACTACTTTAAACGG	pRLYT8-SA2137
SA2137_fus_DF	GTTGATGATATCTATGCCGGCATTACATTTACATTATGG	pRLYT8-SA2137
SA2137-seq-dw	CATTGCGTCAGATTGGGC	pRLYT8-SA2137
SA2137-xho-R	GGGCTCGAGAAGCTACTGTATGTGCAATGCC	pRLYT8-SA2137
SA2137-ext-R1	TTCAATGGTTTAGTTAAACACC	pRLYT8-SA2137
SA2166-R-Xho-R1	CTTCTGCTCGAGAGGTGCTGTATTAGGTATGA	pRLYT8-2166ery
SA2166-Bam-R1	GGCACAGGATCCGTTATAATTTCTGTTTACGCC	pRLYT8-2166ery
Ery-bam-R1	TACTAGGATCCGATCTCACAAAAAATAGGCACAC	pRLYT8-2166ery
ERY-Bam-F1	ACTATGGATCCTTTAAGAACTTTCTTTTTTTAC	pRLYT8-2166ery
SA2166-L-Bam-R1	CCTCCTGGATCCGAATGTCTGAATGAAGTAATCA	pRLYT8-2166ery
SA2166-INT-F2	GAAGACATTGCGAATACTTTTG	pRLYT8-2166ery
SA2166-L-Nar-F1	CCTCCTGGCGCCGAATCGTTGTACCTTTATCCTC	pRLYT8-2166ery
SA0867-ext-F1	GCAAATTACAGAAATTGCCT	pRLYT8-0867
SA0867-sac-F	GGGGAGCTCCACAACAAGAAACTGTTAAAG	pRLYT8-0867
mgtE-seq-up	GGGAGATTCTTTGTATGATGG	pRLYT8-0867
SA0867_fus_UR	AAATCAACATACTCTCTTTTTCATCTGTGTTCATTGAC	pRLYT8-0867
SA0867_fus_DF	GATGAAAAAGAGAGTATGTTGATTTATTTTGGTTTAGC	pRLYT8-0867
mgtE-seq-dw	TATTGGAGTTAAAAACGCTGC	pRLYT8-0867
SA0867-bam-R	GGGGGATCCTCAACCATTTCTTCATCTGG	pRLYT8-0867
SA0867-ext-R1	TACACATGTAATGACTGCGC	pRLYT8-0867
SA0780-Nar-F1	TAATAAGGCGCCAATGGGTATTGATACCATTTTG	pRLYT8-0780AUG
SA0780-Xho-R1	TAATAACTCGAGGCTTTCCACTAAACGCTTTTG	pRLYT8-0780AUG
SA0780ATG_DsFw	GAGACTACACGCATGATCATTGCCATAATTA	pRLYT8-0780AUG
SA0780ATG_Uprev	TAATTATGGCAATGATCATGCGTGTAGTCTC	pRLYT8-0780AUG
SA2166-L-Nar-F1	CCTCCTGGCGCCGAATCGTTGTACCTTTATCCTC	pRLYT8-2166(A186T & T227I)
SA2166-R-Xho-R1	CTTCTGCTCGAGAGGTGCTGTATTAGGTATGA	pRLYT8-2166(A186T & T227I)
