# Supplementary material for: Genetic screens reveal novel major and minor players in magnesium homeostasis of Staphylococcus aureus
Source: PLoS Genet. 2019 Aug 15;15(8):e1008336. doi: 10.1371/journal.pgen.1008336 (PMC6711546; doi:10.1371/journal.pgen.1008336)
Supplement: S4 Table — (XLSX) [file pgen.1008336.s004.xlsx]

## Sheet: Sheet1
Gene		Operon	Genes in the operon
SA0657	mpfA	No
SA0780	mpfB	Yes	SA0780	mpfB
			SA0781		Hypothetical protein
SA0867	mgte	Yes	SA0863		Hypothetical protein
			SA0864		Hypothetical protein. Possible GTP pyrophosphokinase
			SA0865	ppnK	Hypothetical NAD+ kinase
			SA0866		Hypothetical 23S rRNA pseudouridine synthase
			SA0867	mgtE
			SA0868		Hypothetical Na+/H+ antiporter homologue
SA2137	corA	No
SA2166	corA2	No
